# Supplementary material for: Evolution by gene duplication of Medicago truncatula PISTILLATA-like transcription factors
Source: PubMed Central journal article supplement (PMC4783364; doi:10.1093/jxb/erv571), 2016-01-15
Supplement: supp_erv571_supplementary_figures_S1_S6_tables_S1_S4.pdf [file supp_erv571_supplementary_figures_S1_S6_tables_S1_S4.pdf]

Evolution by gene duplication of *Medicago truncatula* PISTILLATA-like transcription factors. Roque E. *et al.*

SUPPLEMENTARY DATA

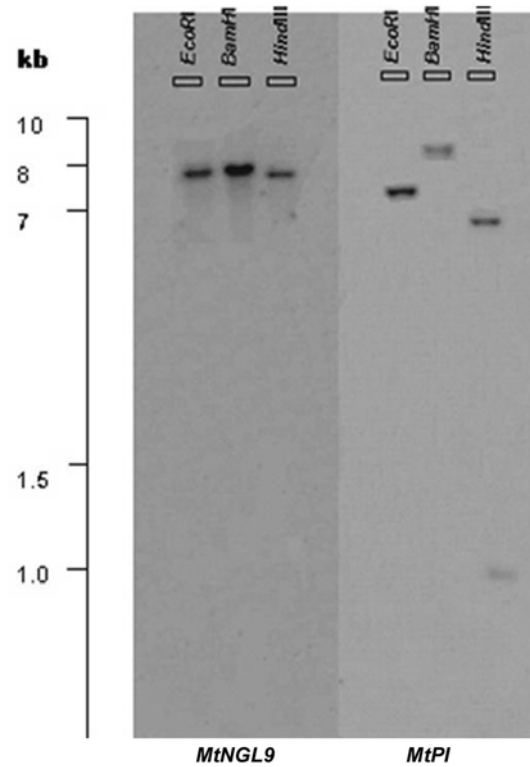

**Fig. S1. Southern blot analysis of the *Medicago truncatula* PI-like genes. *MtPI* and *MtNGL9* are present in the *Medicago* genome as single copies.**

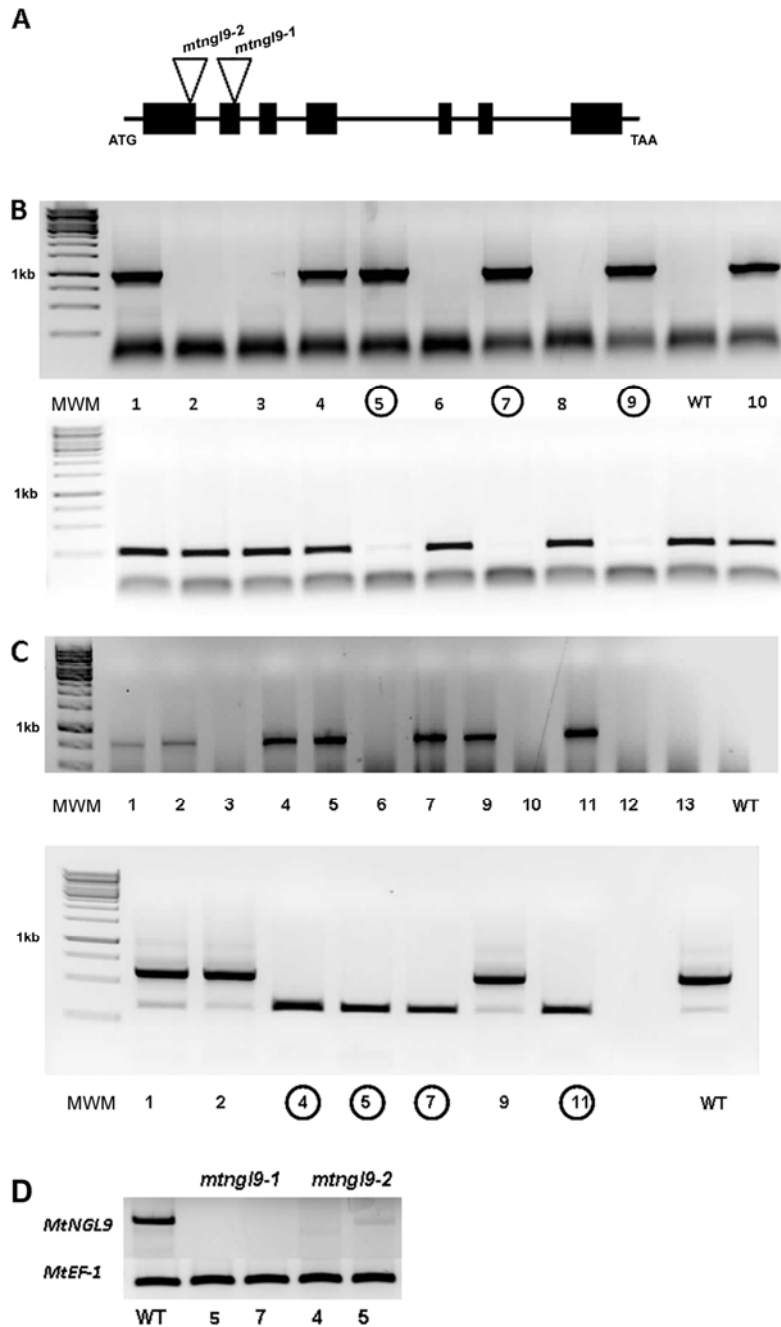

**Fig. S2. Molecular characterization of the *Tnt1* insertions in the *MtNGL9* locus. A.** Schematic diagram of the genomic structure of the *MtNGL9* gene. In NF14948 lines (*mtngl9-1*), *Tnt1* was inserted 360 bp downstream of the ATG codon, at the second exon. In NF12316 lines (*mtngl9-2*), *Tnt1* was inserted 183 bp downstream of the ATG codon, at the end of the first exon. **B.** Genotyping of *mtngl9-1* mutant using NGL9-F/*Tnt1*-R (upper) and NGL9-291/NGL9-612G (lower) primer pairs. Homozygous plants are indicated in circled numbers. **C.** Genotyping of *mtngl9-2* mutant using NGL9-F/*Tnt1*-R (upper) and NGL9-F/NGL9-590G (lower) primer pairs. Homozygous plants are indicated in circled numbers. **D.** RT-PCR results show no detectable *MtNGL9* expression in four homozygous mutant plants. MWM: molecular weight markers; WT: wild-type control.

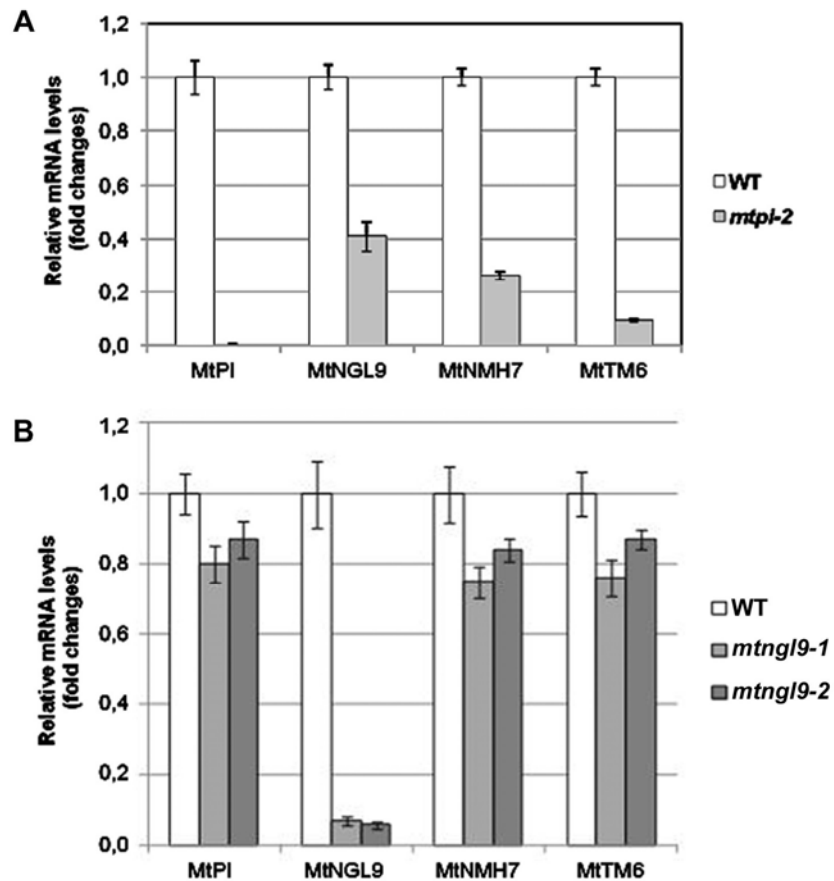

**Fig. S3. qRT-PCR expression analyses of loss-of-function plants. A.** mRNA levels of the B-function genes in floral buds of *mtpi-2*. **B.** mRNA levels of the B-function genes in floral buds of *mtngl9-1* and *mtngl9-2*. The height of the bars for a given gene indicates relative differences in expression levels in floral buds. The expression value of all B-function genes in WT was set to 1.00. Expression levels were plotted relative to this value.

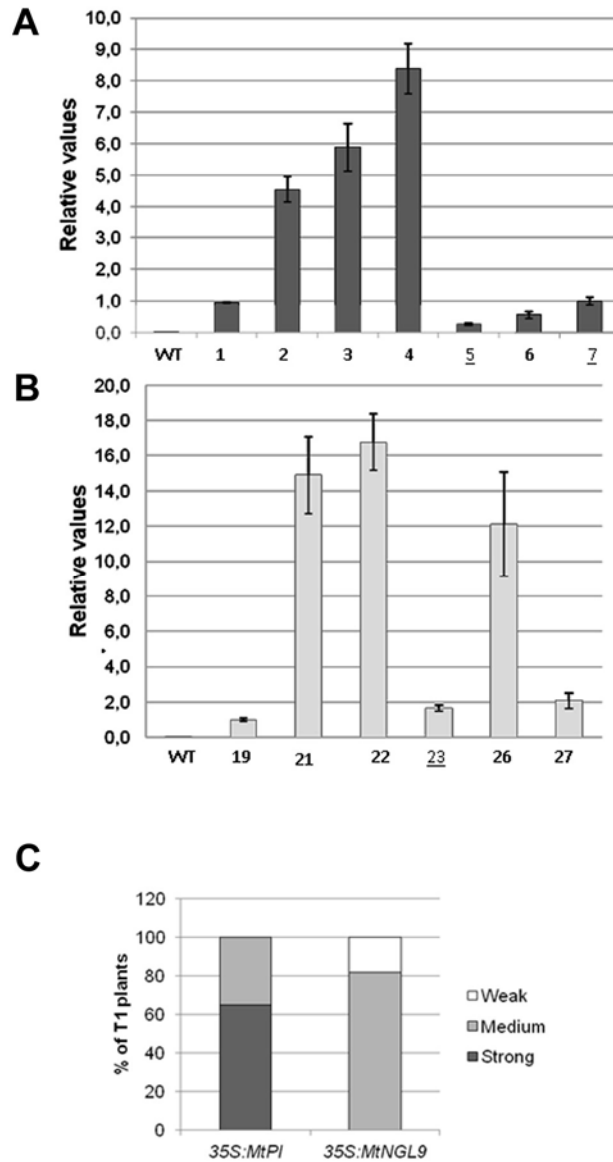

**Fig. S4. Analyses of 35S::MtPI and 35S::MtNGL9 plants.** **A.** Transcript abundance of *MtPI* in 35S::*MtPI* plants. The expression value of *MtPI* in plant number 7 was set to 1.00. Expression levels were plotted relative to this value. Numbers indicate the transgenic line. Underlined number indicates plants classified as medium phenotype, and the remaining plants showed the strong phenotype. **B.** Transcript abundance of *MtNGL9* in 35S::*MtNGL9* plants. The expression value of *MtPI* in plant number 19 was set to 1.00. The number of the transgenic line is indicated. Underlined number indicates plants classified as weak phenotype, and the remaining plants showed the medium phenotype. **C.** Relative proportion of phenotypes observed in plants overexpressing *MtPI* (N<sup>o</sup> of transgenic plants= 17) or *MtNGL9* (N<sup>o</sup> of transgenic plants= 33).

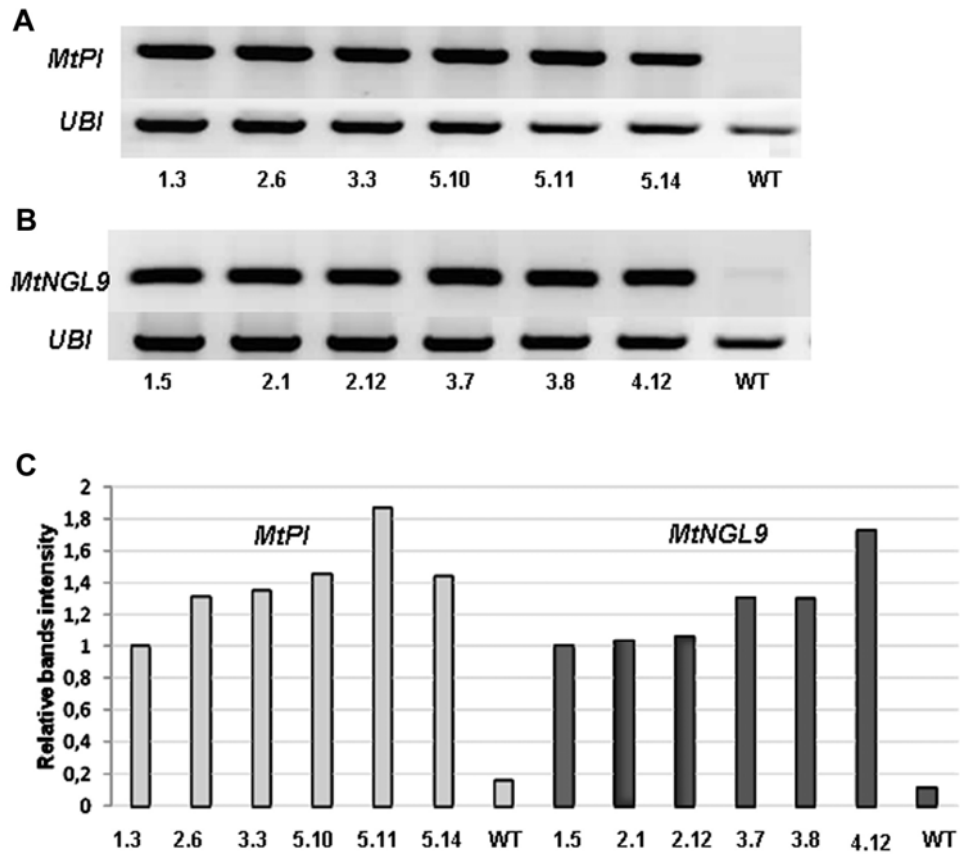

**Fig. S5. RT-PCR expression analyses in *pi-1/pi-1*; 35S:*MtPI* and *pi-1/pi-1*; 35S:*MtNGL9* complementation lines.** **A.** Expression of *MtPI* in *pi-1/pi-1*; 35S:*MtPI* lines. **B.** Expression of *MtNGL9* in *pi-1/pi-1*; 35S:*MtNGL9* lines. **C.** Comparative expression level of *MtPI* and *MtNGL9* in their respective complementation lines. Levels were quantified by measuring the intensity of individual bands using ImageJ densitometry software, and expressed relative to UBIQUITIN signal, as a measure of transcript relative abundance in the different samples. The numbers of the transgenic lines are indicated.

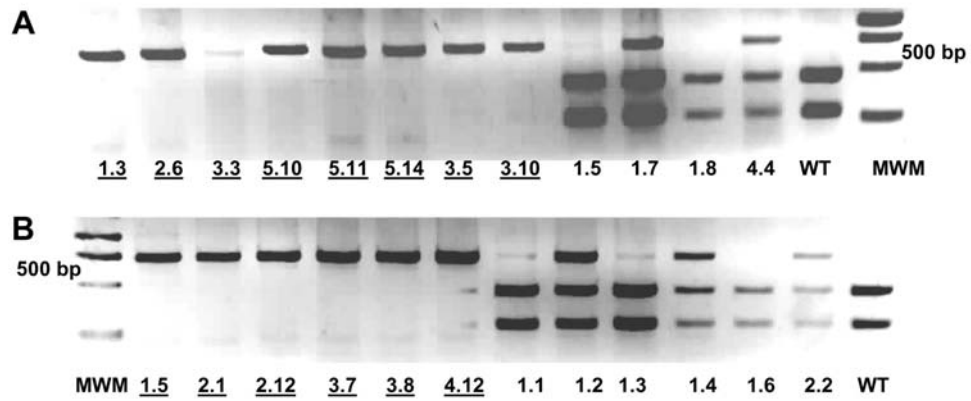

**Fig. S6. Analyses of the *pi-1* complementation by *MtPI* and *MtNGL9*.** **A.** Genotyping of some individuals of the complementation lines by *MtPI*. **B.** Genotyping of some individuals of the complementation lines by *MtNGL9*. Genomic PCR product (729 bp) was digested by *BseGI*. *pi-1/PI*; *35S::MtPI* or *pi-1/PI*; *35S::MtNGL9* background resulting in three fragments: 729, 451 and 278 bp. Two fragments (278 and 451 bp) were obtained in the case of wild-type plants (*PI/PI*; *35S::MtPI* or *PI/PI*; *35S::MtNGL9*). *BseGI* does not cut the 729 bp PCR fragment in *pi-1/pi-1*; *35S::MtPI* or *pi-1/pi-1*; *35S::MtNGL9* background (underlined numbers).

| Classification                                                                                                                                                                  | Taxa                                                                                                                                                                                                                                              | PI-homologues                                                                                                                                                                                                                                                                                                                                                                         | Gymnosperm B-class genes                                                                                                                                                                                                                    |
|---------------------------------------------------------------------------------------------------------------------------------------------------------------------------------|---------------------------------------------------------------------------------------------------------------------------------------------------------------------------------------------------------------------------------------------------|---------------------------------------------------------------------------------------------------------------------------------------------------------------------------------------------------------------------------------------------------------------------------------------------------------------------------------------------------------------------------------------|---------------------------------------------------------------------------------------------------------------------------------------------------------------------------------------------------------------------------------------------|
| <b>GYMNOSPERMS</b><br>Coniferales<br>Pinaceae<br><br>Cupressaceae<br><br>Gnetaceae                                                                                              | <i>Picea abies</i><br><br><i>Pinus radiata</i><br><i>Cryptomeria japonica</i><br><br><i>Gnetum gnemon</i>                                                                                                                                         |                                                                                                                                                                                                                                                                                                                                                                                       | <i>DAL 13-1</i> (AF158539)<br><i>DAL 13-2</i> (AF158541)<br><i>PrDGL</i> (AF120097)<br><i>CryMADS2</i> (AF097747)<br><i>CryMADS1</i> (AF097746)<br><i>GnegGGM2</i> (AJ132201)<br><i>GnegGGM13</i> (AJ132219)<br><i>GnegGGM15</i> (AJ251555) |
| <b>ANGIOSPERMS</b><br>Nymphaeaceae                                                                                                                                              | <i>Nuphar japonica</i><br><br><i>Nuphar advena</i><br><i>Euryale ferox</i>                                                                                                                                                                        | <i>Nj PI-1</i> (AB158359)<br><i>NjPI-2</i> (AB158360)<br><i>Nu.ad.PI</i> (AY337736)<br><i>EfPI</i> (AB158350)                                                                                                                                                                                                                                                                         |                                                                                                                                                                                                                                             |
| MAGNOLIIDS<br>Magnoliaceae                                                                                                                                                      | <i>Liriodendrum tulipifera</i><br><i>Magnolia praecocissima</i>                                                                                                                                                                                   | <i>LtPI</i> (AF052864)<br><br><i>MpMADS8</i> (AB050650)                                                                                                                                                                                                                                                                                                                               |                                                                                                                                                                                                                                             |
| Laurales<br>Calycanthaceae<br><br>Lauraceae                                                                                                                                     | <i>Calycanthus floridus</i><br><br><i>Persea americana</i>                                                                                                                                                                                        | <i>CfPI-1</i> (AF230708)<br><i>CfPI-2</i> (AF230709)<br><i>Pe.am.PI</i> (AY337738)                                                                                                                                                                                                                                                                                                    |                                                                                                                                                                                                                                             |
| Piperales<br>Piperaceae                                                                                                                                                         | <i>Peperomia hirta</i><br><i>Piper magnificum</i>                                                                                                                                                                                                 | <i>PhiPI</i> (AF052865)<br><i>PmPI-1</i> (AF052866)<br><i>PmPI-2</i> (AF052867)                                                                                                                                                                                                                                                                                                       |                                                                                                                                                                                                                                             |
| <b>MONOCOTS</b><br>Poales<br>Poaceae<br><br>Liliales<br>Liliaceae                                                                                                               | <i>Oryza sativa</i><br><br><i>Zea mays</i><br><br><i>Phalaenopsis equestris</i>                                                                                                                                                                   | <i>OsMADS2</i> (L37526)<br><i>OsMADS4</i> (L37527)<br><i>nmads1</i> (AF095645)<br><i>ZMM16</i> (AJ292959)<br><i>ZMM18</i> (AJ292960)<br><i>ZMM29</i> (AJ292961)<br><br><i>PeMADS6</i> (AY678299)                                                                                                                                                                                      |                                                                                                                                                                                                                                             |
| Alismatales<br>Alismataceae                                                                                                                                                     | <i>Sagittaria montevidensis</i>                                                                                                                                                                                                                   | <i>SmPI</i> (AF230712)                                                                                                                                                                                                                                                                                                                                                                |                                                                                                                                                                                                                                             |
| <b>EUDICOTS</b> (early divergent eudicots)<br><br>Ranunculales<br>Papaveraceae<br><br>Ranunculaceae<br><br>Trochodendraceae                                                     | <i>Papaver nudicaule</i><br><br><i>Papaver somniferum</i><br><br><i>Sanguinaria canadensis</i><br><i>Akebia kinata</i><br><i>Ranunculus bulbosus</i><br><br><i>Ranunculus ficaria</i><br><br><i>Delphinium ajacis</i><br>Trochodendron aralioides | <i>PnPI-1</i> (AF052855)<br><i>PnPI-2</i> (AF052856)<br><i>PapsPI-1</i> (EF071994)<br><i>PapsPI-2</i> (EF071995)<br><i>ScPI</i> (AF130871)<br><i>AkqPI</i> (AY162837)<br><i>RbPI-1</i> (AF052859)<br><i>RbPI-2</i> (AF052860)<br><br><i>RfPI-1</i> (AF052858)<br><i>RfPI-2</i> (AF130872)<br><i>DaPI</i> (AF052862)<br><i>Tr.ar. PI-1</i> (EF436259)<br><i>Tr.ar. PI-2</i> (EF436260) |                                                                                                                                                                                                                                             |
| <b>CORE EUDICOTS</b><br>Caryophyllales<br>Caryophyllaceae<br><br>Saxifragales<br>Saxifragaceae<br><br><b>ROSIDS</b><br>Euforbiaceae<br>Euphorbiaceae<br><br>Vitales<br>Vitaceae | <i>Silene latifolia</i><br><br><i>Ribes sanguineum</i><br><br><i>Ricinus communis</i><br><br><i>Vitis Vinifera</i>                                                                                                                                | <i>SLM3</i> (X89108)<br><br><i>Ri.sa. PI</i> (AY337742)<br><br><i>Ri.co. PI</i> (XM_002520262)<br><br><i>VvPI</i> (DQ059750.1)                                                                                                                                                                                                                                                        |                                                                                                                                                                                                                                             |

|                                                   |                                                                                        |                                                                |  |
|---------------------------------------------------|----------------------------------------------------------------------------------------|----------------------------------------------------------------|--|
| Myrtales<br>Myrtaceae                             | <i>Eucalyptus grandis</i>                                                              | EGM2 (AF029976)                                                |  |
| <i>Eurosid I</i><br>Cucurbitales<br>Cucurbitaceae | <i>Cucumis sativus</i>                                                                 | CUM26 (AF043255)                                               |  |
| Fabales<br>Fabaceae                               | <i>Medicago sativa</i>                                                                 | MsNGL9 (AF335473)<br><b>MsPI</b> (KJ470631)<br>MtPI (FJ403468) |  |
|                                                   | <i>Medicago truncatula</i>                                                             | MtNGL9 (FJ403469)<br>PsPI (AY842791)                           |  |
|                                                   | <i>Pisum sativum</i>                                                                   | <b>PsNGL9</b> (KJ470632)<br>LjPIa (AY770398)                   |  |
|                                                   | <i>Lotus japonicus</i>                                                                 | LjPIb (AY770399)                                               |  |
|                                                   | <i>Glycine max</i>                                                                     | GmPI1 (BT089901)<br>GmPI2 (BT090476)                           |  |
| Malvales<br>Malvaceae                             |                                                                                        | GhMADS12 (FJ409869)                                            |  |
| Rosales<br>Rosaceae                               | <i>Gossypium hirsutum</i>                                                              |                                                                |  |
| <i>EurosidII</i>                                  | <i>Malus domestica</i><br><i>Rosa rugosa</i>                                           | MdPI (AJ291490)<br>MASAKO BP (AB038462)                        |  |
| Brassicales<br>Brassicaceae                       | <i>Arabidopsis Thaliana</i>                                                            | AtPI (D30807)                                                  |  |
| <b>ASTERIDS</b>                                   |                                                                                        |                                                                |  |
| Cornales<br>Hydrangeaceae                         | <i>Hydrangea macrophylla</i>                                                           | HmPI (AF230711)                                                |  |
| <i>EuasteridsI</i>                                | <i>Antirrhinum majus</i>                                                               |                                                                |  |
| Lamiales<br>Plantaginaceae                        | <i>Nicotiana tabacum</i><br><i>Petunia hybrida</i>                                     | AmGLO (X68831)                                                 |  |
| Solanales<br>Solanaceae                           |                                                                                        | NtGLO (X67959)<br>PhGLO1 (M91190)<br>PhGLO2 (X69947)           |  |
| <i>Euasterids II</i>                              | <i>Gerbera hybrida</i><br><i>Chrysanthemum morifolium</i><br><i>Hellianthus annuus</i> | GGLO1(AJ009726)<br>CDM86 (AY173061)<br>He.an.PI (AY157725)     |  |

**Table S1. Sequences from different plant species used in the elaboration of the phylogenetic tree with their respective GenBank accession numbers.**



| Model | Log-likelihood ( $\ell$ ) | Parameter estimates                                                                   | Amino acids                             |
|-------|---------------------------|---------------------------------------------------------------------------------------|-----------------------------------------|
| G&Y   | -10937.758                | $\omega = 0.147$                                                                      | -                                       |
| FRM   | -10773.329                | -                                                                                     | -                                       |
| BSMN  | -10837.050                | $\omega_0 = 0.144, P_0 = 0.79; \omega_1 = 1, P_1 = 0.21$                              | -                                       |
| BSM   | -10836.367                | $\omega_0 = 0.144, P_0 = 0.68; \omega_1 = 1, P_1 = 0.18, \omega_2 = 3.71, P_2 = 0.11$ | Leu9, Ser47,<br>Ser14, Arg40,<br>Ala74. |

**Table S2. Maximum-likelihood test of adaptive evolution in the duplicated *M. truncatula* PISTILATA-like transcription factors.** To identify signatures of adaptive evolution after gene duplication, we conducted four models, all implemented in the program PAML package version 4.7 (Yang, 2007): (a) G&Y model estimates the non-synonymous-to-synonymous rates ratio ( $\omega$ ) for the entire alignment and phylogenetic tree, (b) FRM model (Free-ratio model), estimates one  $\omega$  per phylogenetic branch, (c) BSMN refers to the neutral branch-site model and allows inferring  $\omega$  under a neutral evolution model ( $0 < \omega \leq 1$ ) for a user-specified branch of the tree, which in this case was the branch leading to the MtNGL9 duplicate, and (d) BSM model is the branch-site model that allows  $\omega$  to be greater than 1, hence making it possible the identification of positive selection. The proportion of sites under each  $\omega$  category ( $P_i$ ) was also estimated.

| <b>Genotype</b>                       | <b>Weak rescue</b> | <b>Strong rescue</b> | <b>N°.of F2 kanamycin resistant plants</b> | <b>N°.of expected <i>pi-1/pi-1</i> plants</b> |
|---------------------------------------|--------------------|----------------------|--------------------------------------------|-----------------------------------------------|
| <b><i>pi-1/ pi-1; 35S::MtPI</i></b>   | 5 (26,3 %)         | 14 (73,7 %)          | 65                                         | 16,24 (1/4)                                   |
| <b><i>pi-1/ pi-1; 35S::MtNGL9</i></b> | 14 (100%)          | 0                    | 64                                         | 16 (1/4)                                      |

**Table S3. Summary of rescue phenotypes.**

| Primer name    | Sequence 5'-3'                        | Use                                                                        |
|----------------|---------------------------------------|----------------------------------------------------------------------------|
| MtNGL9-ATG     | ATGGGAAGAGGAAAGATTGAG                 | For <i>PsNGL9</i> cDNA isolation                                           |
| MtNGL9-638     | GCTGAAGTAGTGAGTGAAGC                  |                                                                            |
| MtPI-ATG       | ATGGGAAGAGGTAAGATTGAG                 | For <i>MsPI</i> cDNA isolation                                             |
| MtPI-548       | GGTTAAATCCATTGTCCATGCA                |                                                                            |
| MsPI-363       | GATGGCCCTTGAGGAATCCCTT                |                                                                            |
| MtNGL9-511     | GGCAGTGGAAGGTGGGAGATAA                | For southern blot hybridization<br>and<br>RNA <i>in situ</i> hybridization |
| MtNGL9-753     | GAAAGTGTAAAGCCAGGGATC                 |                                                                            |
| MtPI-504       | GGCACTTGAAGGTGTGGGAAA                 |                                                                            |
| MtPI-801       | GAAACCAAATTCATCACTTCATA               |                                                                            |
| MtPI-Sall      | GGTCGACCCATGGGAAGAGGTAAGATTGAG        | For overexpression constructs                                              |
| MtPI-BamHI     | GCGGATCCTTAAATCCATTGTCCATGCATG        |                                                                            |
| MtNGL9-Sall    | GGTCGACCCATGGGAAGAGGAAAGATTGAG        |                                                                            |
| MtNGL9-BamHI   | CGGGATCCTTATAATCCATTTATCTCCCA         |                                                                            |
| BAD-MtPI-FOR   | GCTGGATCCGCATGGGAAGAGGTAAGATTGAG      | For yeast two-hybrid constructs                                            |
| BD-MtPI-REV    | GTCGTCGACTTAAATCCATTGTCCATGCATG       |                                                                            |
| BAD-MtNGL9-FOR | GCTGGATCCGCATGGGAAGAGGAAAGATTGAG      |                                                                            |
| BD-MtNGL9-REV  | GTCGTCGACAAAGCTGAAGTAGTGAGTGAAG       |                                                                            |
| IKC-MtNMH7-FOR | GCTGGATCCGCGCCTCAACAAAGCAGTTTTTCGAT   |                                                                            |
| AD-MtNMH7-REV  | GTCGAATTCCTAAAAAAGTAAAGGGTAAGTGGTG    |                                                                            |
| IKC-MtTM6-FOR  | GCTGGATCCGCGCTCTCTACAAAGAAGATTATTGATC |                                                                            |
| AD-MtTM6-REV   | GTCTCGAGTCAACCCAGGCGCAAATCGTCA        |                                                                            |
| Tnt1-R         | CAGTGAACGAGCAGAACCTGTG                | For <i>mtngl9</i> mutants genotyping                                       |
| NGL9-F         | GGGAAGAGGAAAGATTGAGATC                |                                                                            |
| NGL9-590G      | GCTACCTGAGCTGAATTTGCATGTC             |                                                                            |
| NGL9-612G      | CCAACCATATATAGCTAATCTAGCTACCTG        |                                                                            |
| CAPS-FOR       | CCTAAAATTGAGAAAGAGATAGAGAG            | For <i>pi-1</i> mutant genotyping                                          |
| CAPS-REV       | CGCATAAGATTTGGTCTTGATGGTTTC           |                                                                            |
| MtPI qRT-FOR   | GCTGATGGCCCTTGAGGAAT                  | For qRT-PCR                                                                |
| MtPI qRT-REV   | TCACGGACGCCAGTAAGACC                  |                                                                            |
| MtNGL9 qRT-FOR | AACTCAAGAAAGAGAATGAGGA                |                                                                            |
| MtNGL9 qRT-REV | TAAGACATCCTCTAAGCTCATC                |                                                                            |
| MtNMH7 qRT-FOR | TTAGGTCCACGCATGTTTTGC                 |                                                                            |
| MtNMH7 qRT-REV | AGGATTAGGATGAGTAGGCTGTAAGC            |                                                                            |
| MtTM6 qRT-FOR  | CGAAGGAGACGAGGAATCAG                  |                                                                            |
| MtTM6 qRT-REV  | AGAGTGGAAAGCACCATTGGC                 |                                                                            |
| Sec.Ag-qRT-FOR | TGGCTACTAGGGTTGCTGGC                  |                                                                            |
| Sec.Ag-qRT-REV | CCTCACCCAGTCCAGTGGA                   |                                                                            |
| MsNGL9 qRT-FOR | ATAAAGAAGCTGAATCTGGGTTTTTG            |                                                                            |
| MsNGL9 qRT-REV | ACACGCATATATAATGTAATGTAACCTCAA        |                                                                            |
| MsPI qRT-FOR   | GTGTGTTTTCTAAATAGCCATTGATC            |                                                                            |
| MsPI qRT-REV   | GCCATATTAAGCAACATACATTTTTTTC          |                                                                            |
| PsPI qRT-FOR   | TGGACAATGGATTTAACCAGATCA              |                                                                            |
| PsPI qRT-REV   | GCATAATATTGAGCAAATAATTCCCT            |                                                                            |
| PsNGL9 qRT-FOR | TGATGAATTTGATGAGAGTACTGGAAG           |                                                                            |
| PsNGL9 qRT-REV | GAAAATGGCATCTGGGAATTGA                |                                                                            |
| PsACTIN-11-FOR | AGGTGCTGTACCAACCATCCA                 |                                                                            |
| PsACTIN-11-REV | CGTGAATTCCTGCTGCTTCC                  |                                                                            |
| MsNGL9 qRT-FOR | ATAAAGAAGCTGAATCTGGGTTTTTG            |                                                                            |
| MsNGL9 qRT-REV | ACACGCATATATAATGTAATGTAACCTCAA        |                                                                            |
| MsPI qRT-FOR   | GTGTGTTTTCTAAATAGCCATTGATC            |                                                                            |
| MsPI qRT-REV   | GCCATATTAAGCAACATACATTTTTTTC          |                                                                            |
| MsEF-1-FOR     | CAGGCTGATTGTGCAGTCCTT                 |                                                                            |
| MsEF-1-REV     | CCAGCTTCAAAACCACCACTG                 |                                                                            |
| AtUBQ FOR      | GGCCTTGATAATCCCTGATGAATAAG            |                                                                            |
| AtUBQ REV      | AAAGAGATAACAGGAACGGAAACATA            |                                                                            |
| MtNGL9 qRT-FOR | GCTGATGGCCCTTGAGGAAT                  | For semi-quantitative RT-PCR                                               |
| MtNGL9-507 REV | CCCTTGTTGCTGCTGGAGGATA                |                                                                            |
| MtPI-363       | GATGGCCCTTGAGGAATCCCTT                |                                                                            |
| MtPI-548       | GGTTAAATCCATTGTCCATGCA                |                                                                            |
| MtEF-1-FOR     | AGAAGGAAGCTGCTGAGATGAAC               |                                                                            |
| MtEF-1-REV     | CTGCTTCACTCCAAGAGATAAATGC             |                                                                            |
| AtUBQ FOR-S    | GATCTTTGCCGAAAACAATTGGAGGATGGT        |                                                                            |
| AtUBQ REV-S    | CGACTTGTCAATTAGAAAGAAAGAGATAACAGG     |                                                                            |

Table S4. Primers used in this work.
